# Supplementary material for: Prediction of disease genes using tissue-specified gene-gene network
Source: PubMed Central journal article supplement (PMC4243117; doi:10.1186/1752-0509-8-s3-s3), 2014-10-22

**(a) ROC Curve - Colorectal Cancer**

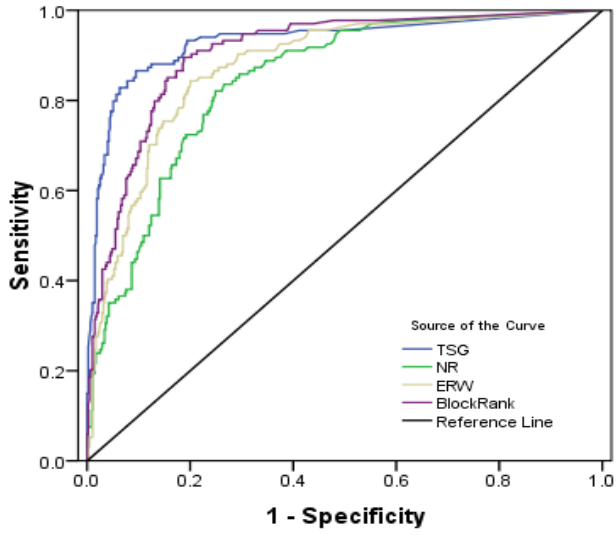

**(b) ROC Curve - Lung Cancer**

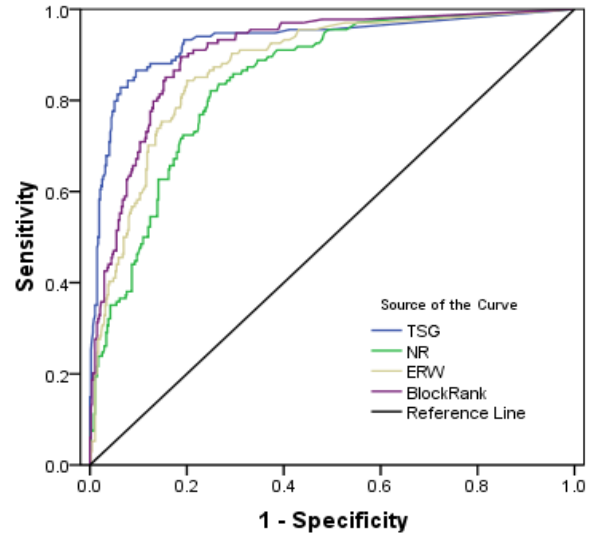

**(c) ROC Curve - Prostate Cancer**

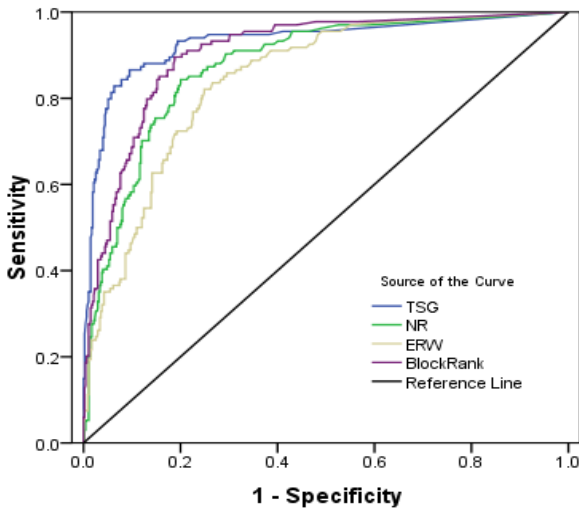

**(d) ROC Curve - Diabetes Mellitus**

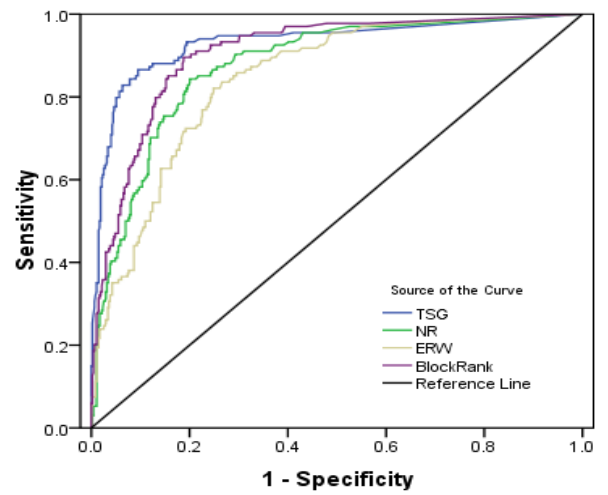

**(e) ROC Curve - Alzheimer Disease**

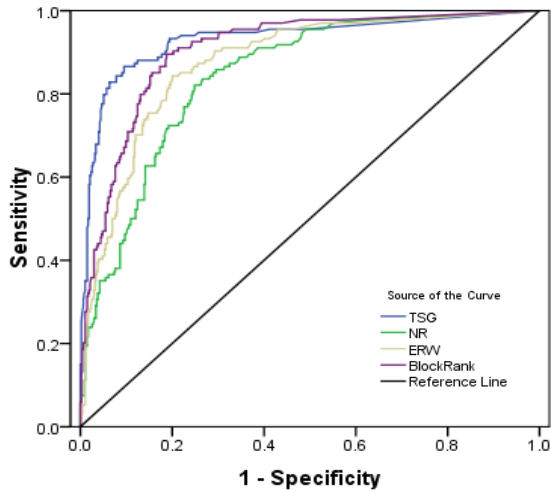

Supplement: 1752-0509-8-S3-S3-S2.pdf [file 1752-0509-8-S3-S3-S2.pdf]
